# Supplementary material
Source: publisher figshare collection journal article supplement (https://tandf.figshare.com/ndownloader/files/13086092)
Supplement: Supplementary file 1 [file 13086092]

	Precision	Recall
S�ddeutsche Zeitung-Facebook	0.504961411	0.609042553
S�ddeutsche Zeitung-Twitter	0.489159892	0.58699187
Guardian-Facebook	0.51826087	0.67268623
Guardian-Twitter	0.453222453	0.569934641
NYT-Facebook	0.52398524	0.701812191
NYT-Twitter	0.505928854	0.699453552
